# Supplementary material for: Computational model predicts protein binding sites of a luminescent ligand equipped with guanidiniocarbonyl-pyrrole groups
Source: Beilstein J Org Chem. 2022 Sep 23;18:1322–31. doi: 10.3762/bjoc.18.137 (PMC9520824; doi:10.3762/bjoc.18.137)
Supplement: File 2 — PDB2PQR output for lysine. [file Beilstein_J_Org_Chem-18-1322-s002.xlsx]

## Sheet: Sheet1
	X	Y	Z	Charge	Radius
N	-3.239	-2.406	0.5	-0.4157	1.55
C	-3.837	-3.583	1.071	-0.149	1.7
H	-3.856	-1.728	0.084	0.2719	1.1
H	-4.923	-3.48	1.002	0.0976	1.1
H	-3.535	-3.674	2.116	0.0976	1.1
H	-3.509	-4.461	0.509	0.0976	1.1
C	-1.475	-0.959	-0.152	-0.1866	1.7
C	-1.88	-2.204	0.475	0.8143	1.7
O	-1.067	-2.994	0.939	-0.5873	1.52
C	-2.223	0.053	-0.724	-0.2581	1.7
C	-1.337	1.05	-1.191	-0.1362	1.7
C	-0.046	0.665	-0.865	-0.1762	1.7
N	-0.154	-0.58	-0.27	-0.068	1.55
C	1.216	1.329	-1.047	0.739	1.7
O	2.309	0.853	-0.766	-0.5006	1.52
H	-3.302	0.082	-0.801	0.2222	1.1
H	-1.653	1.952	-1.694	0.1839	1.1
H	0.623	-1.143	0.068	0.2799	1.1
N	1.123	2.644	-1.569	-0.6666	1.55
C	2.147	3.469	-1.791	1.0873	1.7
N	3.409	3.122	-1.536	-1.0289	1.55
N	1.912	4.691	-2.283	-1.0289	1.55
H	0.204	2.985	-1.773	0.3343	1.1
H	3.6	2.192	-1.156	0.4941	1.1
H	4.197	3.734	-1.691	0.4941	1.1
H	0.979	5.03	-2.487	0.4941	1.1
H	2.674	5.331	-2.473	0.4941	1.1
