# Supplementary material for: Computational model predicts protein binding sites of a luminescent ligand equipped with guanidiniocarbonyl-pyrrole groups
Source: Beilstein J Org Chem. 2022 Sep 23;18:1322–31. doi: 10.3762/bjoc.18.137 (PMC9520824; doi:10.3762/bjoc.18.137)
Supplement: File 3 — PDB2PQR output for GCP. [file Beilstein_J_Org_Chem-18-1322-s003.xlsx]

## Sheet: Sheet1
	X	Y	Z	Charge	Radius
H	-0.529	-0.569	0.955	0.1123	1.1
C	-0.41	0.146	0.154	-0.3662	1.7
H	-0.762	1.11	0.49	0.1123	1.1
H	-1.005	-0.17	-0.69	0.1123	1.1
C	1.048	0.238	-0.245	0.5972	1.7
O	1.659	-0.755	-0.662	-0.5679	1.52
N	1.748	1.526	-0.136	-0.3479	1.55
H	1.334	2.461	0.21	0.2747	1.1
C	3.116	1.288	-0.589	-0.24	1.7
H	3.327	0.206	-0.507	0.1426	1.1
C	3.254	1.733	-2.071	-0.0094	1.7
H	3.017	2.813	-2.159	0.0362	1.1
H	2.487	1.223	-2.686	0.0362	1.1
C	4.654	1.451	-2.67	0.0187	1.7
H	4.875	0.367	-2.604	0.0103	1.1
H	5.436	1.948	-2.066	0.0103	1.1
C	4.848	1.936	-4.11	-0.0479	1.7
H	4.631	3.022	-4.173	0.0621	1.1
H	4.12	1.434	-4.776	0.0621	1.1
C	6.292	1.658	-4.547	-0.0143	1.7
H	6.57	0.599	-4.363	0.1135	1.1
H	7.003	2.266	-3.949	0.1135	1.1
N	6.437	1.962	-5.981	-0.3854	1.55
H	5.877	2.785	-6.235	0.34	1.1
H	7.407	2.194	-6.218	0.34	1.1
H	6.133	1.138	-6.48	0.34	1.1
C	4.11	2.013	0.288	0.7341	1.7
O	3.941	3.189	0.639	-0.5894	1.52
N	5.314	1.301	0.738	-0.4157	1.55
H	5.571	0.328	0.518	0.2719	1.1
C	6.073	2.233	1.553	-0.149	1.7
H	5.827	3.248	1.28	0.0976	1.1
H	5.841	2.085	2.598	0.0976	1.1
H	7.132	2.077	1.404	0.0976	1.1
